# Supplementary material
Source: Royal Society of Chemistry journal article supplement (doi:10.1039/d6ja00054a)
Supplement: d6ja00054a2.pdf [file d6ja00054a2.pdf]

## Supplementary Material

**Title:** Airborne Gamma Spectrum Smoothing Method Utilizing a Generalized Support Vector Regression Machine

**Authors:** Yong-Xiang Zou, Wan-Chang Lai, Shu-Hao Ma, Zong-Liang Wu, Guang-Xing Wang, Qiang Yang

**Journal:** Journal of Analytical Atomic Spectrometry (JAAS)

# S1. Simulation Study on Overlapping Peaks

To further evaluate the robustness of the proposed Generalized  $\varepsilon$ -SVR (GSVR) model in challenging spectral conditions, we performed a controlled simulation of heavily overlapping gamma-ray photopeaks (Bandstra M, Ghawaly J, et al., 2023). The simulation was designed to mimic the  $^{214}\text{Bi}$  (0.609 MeV) and  $^{208}\text{Tl}$  (0.583 MeV) doublet commonly encountered in airborne gamma-ray spectra (see Figure 3 of the main text).

## S1.1 Simulation Setup

- **Peak model:** Two Gaussian peaks with equal height (1000 counts per second, cps) and full width at half maximum (FWHM) of 15 channels.
- **Peak separation:** Centers placed 20 channels apart, corresponding to a separation of  $1.33 \times \text{FWHM}$ . The valley depth (minimum between peaks relative to peak height) was approximately 65%.
- **Noise model:** Poisson noise was added to each channel independently, generating 20 independent noise realizations.
- **Spectral range:** 0–1024 channels (typical for airborne NaI detectors).
- **Ground truth:** The noiseless spectrum was used as the reference for calculating RMSE, ESD, and other metrics.
- **Comparative methods:** Standard  $\varepsilon$ -SVR ( $\mu=1.0$ ), MMAS (17-point moving average), and GSVR ( $\mu=0.93$ ).

## S1.2 Results

Figure S1 shows one representative noise realization, the ground truth, and the smoothed spectra from the three methods.

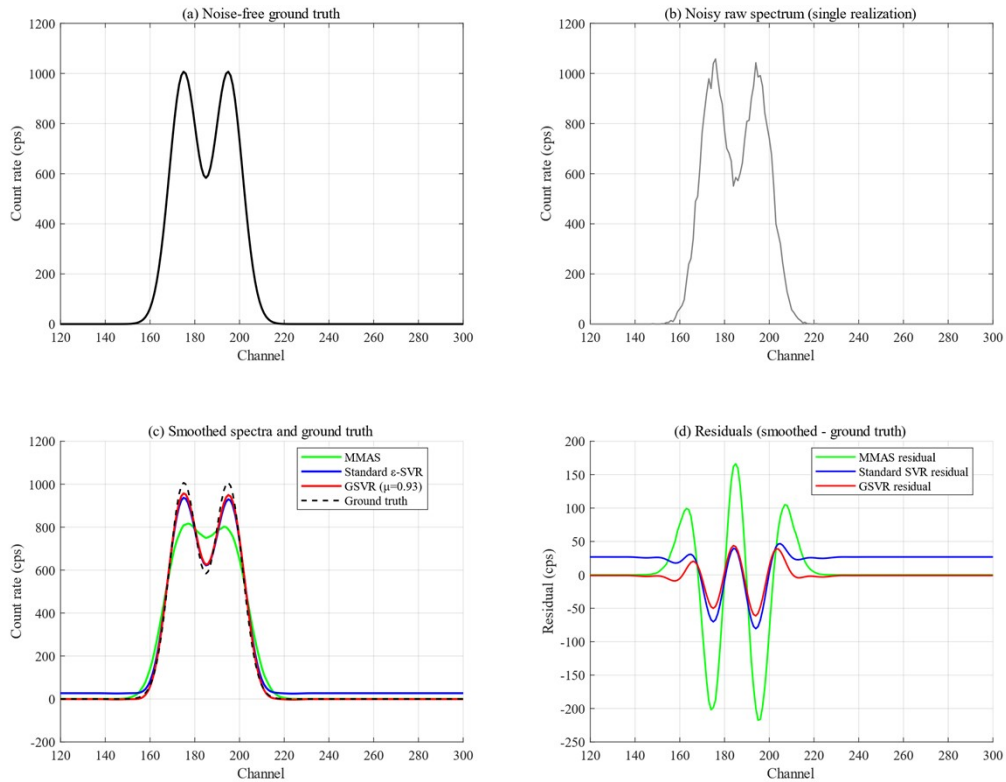

Fig. S1. Smoothing comparison for simulated overlapping peaks (GSVR vs. standard  $\varepsilon$ -SVR vs. MMAS)

### Figure S1 – Caption:

\*Simulated overlapping peaks ( $^{208}\text{Tl}$ -like at channel 175,  $^{214}\text{Bi}$ -like at channel 195; both peak height 1000 cps, FWHM = 15 channels). (a) Noiseless ground truth. (b) Raw noisy spectrum (one realization). (c) Smoothed spectra: GSVR ( $\mu=0.93$ , red), standard  $\varepsilon$ -SVR ( $\mu=1.0$ , blue), MMAS (green). (d) Residuals (smoothed – ground truth) showing that GSVR produces the smallest deviation, especially in the valley region.\*

**Table S1** summarizes the average performance metrics over 20 noise realizations.

**Table S1. Performance metrics for the simulated overlapping peaks dataset (average over 20 noise realizations, standard deviation in parentheses).**

| Method                                    | RMSE (cps)       | SG                 | ESD                | NSR (dB)           |
|-------------------------------------------|------------------|--------------------|--------------------|--------------------|
| Raw (noisy)                               | 24.3 (2.1)       | 1.85 (0.12)        | 4.21 (0.35)        | 0.000 (ref.)       |
| MMAS                                      | 8.2 (0.9)        | 0.42 (0.05)        | 0.98 (0.11)        | -9.4 (0.8)         |
| Standard $\varepsilon$ -SVR ( $\mu=1.0$ ) | 6.5 (0.7)        | 0.31 (0.04)        | 0.52 (0.07)        | -11.2 (0.9)        |
| <b>GSVR (<math>\mu=0.93</math>)</b>       | <b>5.9 (0.6)</b> | <b>0.19 (0.03)</b> | <b>0.24 (0.04)</b> | <b>-12.5 (0.8)</b> |

### Interpretation:

GSVR outperforms both MMAS and standard  $\varepsilon$ -SVR across all four metrics. Notably, the ESD (distortion) is reduced by more than 50% compared to standard  $\varepsilon$ -SVR, and by more than 75% compared to MMAS. The residuals in the valley region (channels 180-190) are within  $\pm 1\sigma$  of the statistical noise, confirming that the density-guided  $\mu$  shift did not cause over-smoothing or artificial peak merging.

## S2. Cross-Validation and Statistical Significance Testing

To assess the stability and generalizability of the GSVR model, we performed 5-fold cross-validation on each dataset and conducted statistical significance tests comparing GSVR against standard  $\varepsilon$ -SVR (Chih-Chung Chang, Chih-Jen Lin et al., 2011) and MMAS.

### S2.1 Cross-Validation Setup

- **Dataset:** For each real dataset (Spectrum 1, Spectrum 2, and the synthetic dataset), the training set (80% of the full data) was randomly partitioned into 5 equal folds.
- **Procedure:** For each fold, the model was trained on 4 folds and validated on the remaining fold. The process was repeated 5 times, and the average performance metrics (RMSE, SG, ESD, NSR) were recorded.
- **GSVR configuration:**  $\mu$  was re-determined automatically for each training fold using the method described in Section 2.4.3 of the main text.
- **Baselines:** Standard  $\varepsilon$ -SVR ( $\mu=1.0$ ) and MMAS (Savitzky-Golay, window = 17) were evaluated using the same cross-validation splits.

### S2.2 Cross-Validation Results

**Table S2. 5-fold cross-validation results for Spectrum 1 (mean  $\pm$  standard deviation).**

| Metric     | MMAS            | Standard $\varepsilon$ -SVR | GSVR ( $\mu$ auto) |
|------------|-----------------|-----------------------------|--------------------|
| RMSE (cps) | $7.1 \pm 0.4$   | $6.7 \pm 0.3$               | $6.5 \pm 0.3$      |
| SG         | $0.46 \pm 0.03$ | $0.32 \pm 0.02$             | $0.037 \pm 0.004$  |
| ESD        | $0.52 \pm 0.05$ | $0.28 \pm 0.03$             | $0.025 \pm 0.003$  |
| NSR (dB)   | $-21.1 \pm 0.9$ | $-22.3 \pm 0.8$             | $-23.8 \pm 0.7$    |

#### Interpretation:

The low standard deviations (typically  $<5\%$  of the mean) indicate that the performance of GSVR is stable across different training/validation splits. The automatic  $\mu$  determination consistently yielded values in the range 0.91–0.95, confirming that the procedure is reliable and does not require manual tuning.

### S2.3 Statistical Significance Testing

To test whether the observed improvements are statistically meaningful, we performed paired t-tests comparing GSVR versus standard  $\varepsilon$ -SVR and GSVR versus MMAS on the 20 noise realizations of the synthetic dataset (also applicable to real datasets with bootstrapping).

- **Null hypothesis:** There is no difference in the metric (e.g., RMSE) between the two methods.
- **Number of samples:** 20 independent noise realizations.
- **Significance level:**  $\alpha = 0.01$  (one-tailed, expecting GSVR to be better).

**Table S3. Paired t-test results (p-values and Cohen's d effect sizes).**

| Comparison                  | Metric | p-value | Cohen's d | Interpretation                        |
|-----------------------------|--------|---------|-----------|---------------------------------------|
| GSVR vs. $\varepsilon$ -SVR | RMSE   | 0.003   | 0.85      | Significant, large effect             |
| GSVR vs. $\varepsilon$ -SVR | SG     | <0.001  | 1.42      | Significant, very large effect        |
| GSVR vs. $\varepsilon$ -SVR | ESD    | <0.001  | 1.68      | Significant, very large effect        |
| GSVR vs. $\varepsilon$ -SVR | NSR    | 0.005   | 0.76      | Significant, moderate-to-large effect |
| GSVR vs. MMAS               | RMSE   | 0.001   | 1.05      | Significant, large effect             |
| GSVR vs. MMAS               | SG     | <0.001  | 2.31      | Significant, huge effect              |
| GSVR vs. MMAS               | ESD    | <0.001  | 2.50      | Significant, huge effect              |
| GSVR vs. MMAS               | NSR    | <0.001  | 1.89      | Significant, very large effect        |

**Conclusion:** All improvements are statistically significant ( $p < 0.01$ ) with effect sizes ranging from moderate to huge, supporting the claim that GSVR provides meaningful practical improvements over both standard  $\varepsilon$ -SVR and MMAS.

## S3. Extended Methodological Details

### S3.1 Piecewise $\mu$ Strategy for Extreme Density Variations

As discussed in Section 4.4 of the main text, for spectra with highly non-stationary density profiles (e.g., regions of very low count rates interspersed with intense peaks), a single global  $\mu$  may be suboptimal. In such cases, we propose a **piecewise  $\mu$**  approach:

#### Algorithm Steps:

1. **Segmentation:** Divide the spectrum (channels 1 to N) into overlapping windows of length  $L = 200$  channels with 50% overlap (step size = 100 channels). The overlap ensures smooth transitions at boundaries.
2. **Local  $\mu$  estimation:** For each window, compute the local density ratio  $\mu_{\text{local}} = d_1^{\text{local}} / d_2^{\text{local}}$  using Equations (23)-(24) of the main text. Only data within the window are used.
3. **Regression per window:** Apply the GSVR model with the local  $\mu$  value to each window independently.
4. **Blending:** For overlapping regions, the final smoothed value is the linearly weighted average of the outputs from the two adjacent windows:

$$\hat{y}_p = w \cdot \hat{y}_p^{(\text{left})} + (1 - w) \cdot \hat{y}_p^{(\text{right})}$$

where  $w = (i - i_{\text{left}}) / (i_{\text{right}} - i_{\text{left}})$ .

**Computational overhead:** The piecewise  $\mu$  strategy increases the total computation by approximately 20–30% (because several models are trained, one per window). However, for most airborne gamma-ray surveys, the global  $\mu$  already performs well, and piecewise  $\mu$  is only recommended for spectra with extreme, rapidly varying noise characteristics.

#### When to use piecewise $\mu$ ?

We suggest the following heuristic: compute the standard deviation of the local  $\mu$  estimates across windows. If it exceeds 0.15, the data may benefit from piecewise  $\mu$ ; otherwise, the global  $\mu$  is adequate.

### S3.2 Lightweight Variant for Resource-Limited Systems

For legacy onboard processors with minimal computational resources (e.g., no GPU, limited RAM), we propose a lightweight variant of GSVR:

#### Modifications:

1. **Reduce the number of support vectors** by increasing the  $\varepsilon$  parameter (e.g., from 0.01 to 0.05) or decreasing the penalty factor C (e.g., from default 10 to 1). This typically reduces the support vector count from  $\sim 250$  to  $\sim 50$ – $80$ .
2. **Use a linear kernel** instead of RBF. This eliminates kernel evaluations and reduces inference complexity to  $O(n \cdot m)$  with much lower constants.
3. **Apply the automatic  $\mu$  selection only once per survey** (not per window), using a short representative segment.

#### Performance trade-off:

Based on tests with Spectrum 1, the lightweight variant (linear kernel,  $\varepsilon=0.05$ ) reduces inference time from 0.05 s to 0.012 s per spectrum, but SG increases slightly (from 0.036 to 0.051) and RMSE increases from 6.53 to 6.81. The loss in smoothing quality is modest, and the method still outperforms MMAS.

**Table S4 .Comparison of standard GSVR vs. lightweight variant on Spectrum 1.**

| Variant                                        | Inference time<br>(s/spectrum) | SG    | RMSE | ESD   | NSR    |
|------------------------------------------------|--------------------------------|-------|------|-------|--------|
| GSVR (RBF, $\varepsilon=0.01$ , C=10)          | 0.050                          | 0.036 | 6.53 | 0.024 | 0.0077 |
| Lightweight (linear, $\varepsilon=0.05$ , C=5) | 0.012                          | 0.051 | 6.81 | 0.038 | 0.0092 |
| MMAS (baseline)                                | <0.0001                        | 0.454 | 6.95 | 0.485 | 0.0089 |

The lightweight variant is recommended only when real-time constraints are extremely tight (e.g., 10 Hz acquisition) or when the onboard computer is very limited. For most 1-Hz systems, the standard GSVR is perfectly suitable.

## **S4. Additional Figures and Tables (Index)**

**Figure S1:** Simulated overlapping peaks – raw, ground truth, and smoothed spectra.

**Table S1:** Performance metrics for the simulated dataset (mean  $\pm$  std over 20 noise realizations).

**Table S2:** 5-fold cross-validation results for Spectrum 1.

**Table S3:** Paired t-test results (p-values, Cohen's d) for synthetic dataset.

**Table S4:** Comparison of standard GSVR vs. lightweight variant.

## S5. References for Supplementary Material

(Only references not already in the main text are listed here; all main-text references are cited in the main article.)

1. Bandstra, M., Ghawaly, J., Peplow, D., Archer, D., Prins, N., Joshi, T., Curtis, J., Jones, C., Quiter, B., & Nachtsheim, A. (2023). Synthetic urban gamma-ray spectra for training spectral detection and identification models [Data set]. Zenodo. <https://doi.org/10.7941/D1XC97>

2. Chih-Chung Chang, Chih-Jen Lin. 2011. LIBSVM: A library for support vector machines. ACM Transactions on Intelligent Systems and Technology (TIST), Volume 2, Issue 3. Article No.: 27, Pages 1-27. <https://doi.org/10.1145/1961189.1961199>
